# Supplementary material
Source: PubMed Central journal article supplement (PMC6269311)
Supplement: 2018_196691-Disclosures_and_Contributions.pdf [file 2018_196691-Disclosures_and_Contributions.pdf]

Haematologica  
HAEMATOL/2018/196691  
Version 3  
Acute myeloid leukemia in very old patients

Vladimir Lj Lazarevic, Anders Bredberg, Fryderyk Lorenz, Emma Ölander, Petar Antunovic, Jörg Cammenga, Lovisa Wennström, Lars Möllgård, Stefan Deneberg, Åsa Derolf, Martin Höglund, and Gunnar Juliusson

Disclosures: none

Contributions: VL, AB and GJ designed the study, VL and GJ performed analyses and wrote the manuscript, all authors contributed to the AML registry and approved the manuscript.
